# Supplementary material for: Catalytic transfer hydrogenation of furfural to furfuryl alcohol over a magnetic Fe3O4@C catalyst
Source: Royal Society of Chemistry journal article supplement (doi:10.1039/c9nj04698d), 2019-11-26
Supplement: c9nj04698d1.pdf [file c9nj04698d1.pdf]

## Catalytic transfer hydrogenation of furfural to furfuryl alcohol over magnetic Fe<sub>3</sub>O<sub>4</sub>@C catalyst

Feng Li <sup>a</sup>, Shanshan Jiang<sup>a</sup>, Jin Huang<sup>a,b</sup>, Yue Wang<sup>a</sup>, Shiyu Lu<sup>a</sup>, Cuiqin Li<sup>a1</sup>

<sup>a</sup> Provincial Key Laboratory of Oil & Gas Chemical Technology, College of Chemistry & Chemical Engineering, Northeast Petroleum University, Daqing163318, Heilongjiang, China

<sup>b</sup> Provincial Key Laboratory of Oilfield Applied Chemistry and Technology, Daqing Normal University, Daqing163712, Heilongjiang, China

Table S1 Textural characteristics of Fe<sub>3</sub>O<sub>4</sub>@C with different calcination conditions.

| Temperature (K) | Time (h) | BET (m <sup>2</sup> /g) | Pore volume (cm <sup>3</sup> /g) | Pore diameter (nm) |
|-----------------|----------|-------------------------|----------------------------------|--------------------|
| 573             | 3        | 17.8                    | 0.062                            | 13.9               |
| 673             | 3        | 40.8                    | 0.203                            | 22.6               |
| 773             | 3        | 15.6                    | 0.060                            | 15.2               |
| 873             | 3        | 7.8                     | 0.023                            | 11.6               |
| 673             | 1        | 21.0                    | 0.075                            | 14.3               |
| 673             | 2        | 22.0                    | 0.101                            | 18.3               |
| 673             | 4        | 20.5                    | 0.095                            | 18.5               |
| 673             | 5        | 20.2                    | 0.069                            | 13.7               |

Table S2 The reduction potentials of various alcohols.<sup>1,2</sup>

| Hydrogen donor     | Reduction potential (kJ/mol) |
|--------------------|------------------------------|
| methanol           | 130.1                        |
| ethanol            | 85.4                         |
| isopropanol        | 70.0                         |
| isobutanol         | 69.3                         |
| <i>n</i> -propanol | 87.3                         |
| <i>n</i> -butanol  | 79.7                         |

<sup>1</sup>Corresponding author. Address: College of Chemistry & Chemical Engineering, Northeast Petroleum University, Daqing 163318, China (Li C Q).

Fax: +86 0459 6503006 (Li C Q).

E-mail addresses: licuiqin@nepu.edu.cn (Li C Q).

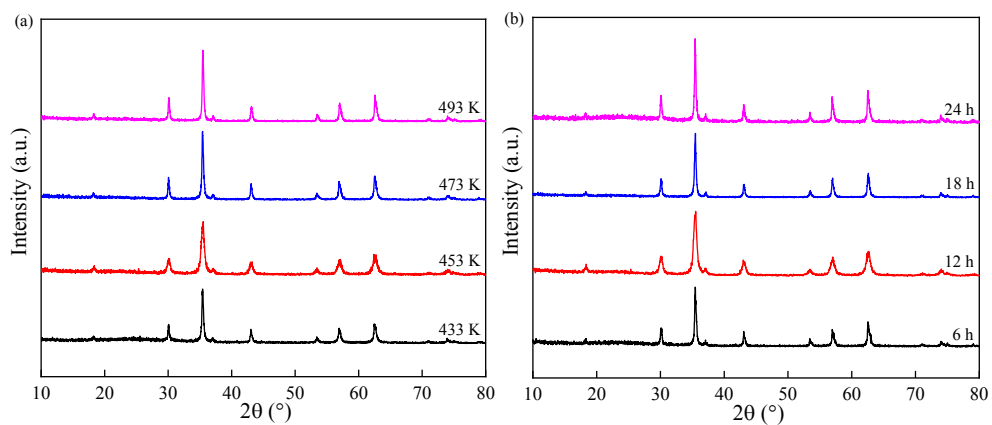

Fig. S1 XRD patterns of Fe<sub>3</sub>O<sub>4</sub>@C with different solvothermal conditions (a) temperature and (b) time.

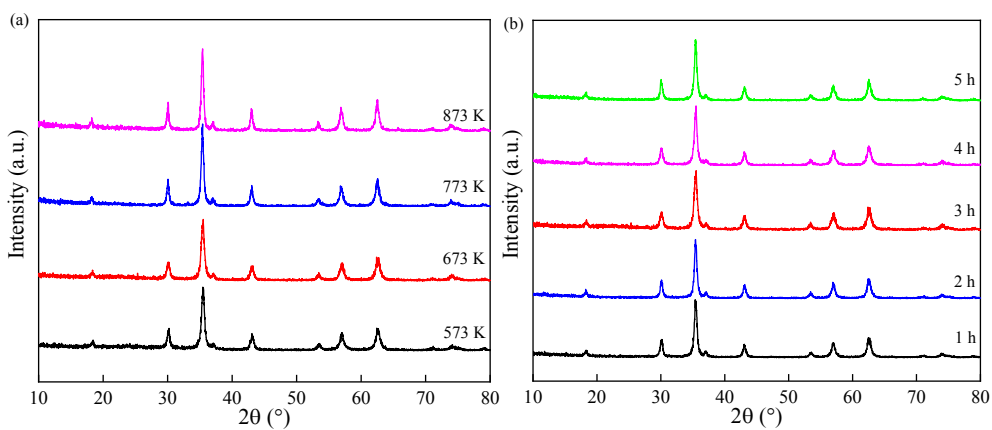

Fig. S2 XRD patterns of Fe<sub>3</sub>O<sub>4</sub>@C with different calcination conditions (a) temperature and (b) time.

#### References

- [1] J. C. van der Waal, P. J. Kunkeler, K. Tan and H. van Bekkum, *J. Catal.*, 1998, **173**, 74-83.
- [2] F. Li, L. J. France, Z. Cai, Y. Li, S. Liu, H. Lou, J. Long and X. Li, *Appl. Catal. B.*, 2017, **214**, 67-77.
